# Supplementary material for: Preparation of cobalt sulfide@reduced graphene oxide nanocomposites with outstanding electrochemical behavior for lithium-ion batteries
Source: Royal Society of Chemistry journal article supplement (doi:10.1039/d0ra01351j), 2020-01-01
Supplement: d0ra01351j1.pdf [file d0ra01351j1.pdf]

Supplementary Material (ESI) for RSC Advances  
This journal is (c) The Royal Society of Chemistry 2011

Electronic Supplementary Informations

**Preparation of cobalt sulfide@reduced graphene oxide nanocomposites  
with outstanding electrochemical behaviors for lithium-ion batteries**

Junhai Wang <sup>a</sup>, Yongxing Zhang <sup>b,\*</sup>, Jun Wang <sup>c</sup>, Lvlv Gao <sup>c</sup>, Zinan Jiang <sup>c</sup>, Haibo Ren <sup>c</sup>,  
Jiarui Huang <sup>c,\*</sup>

<sup>a</sup> School of Material and Chemical Engineering, Chuzhou University, Chuzhou 239000,  
P.R. China

<sup>b</sup> Anhui Province Key Laboratory of Pollutant Sensitive Materials and Environmental  
Remediation, Huaibei Normal University, Huaibei 235000, P.R. China

<sup>c</sup> Key Laboratory of Functional Molecular Solids, Ministry of Education, Key Laboratory  
of Electrochemical Clean Energy of Anhui Higher Education Institutes, College of  
Chemistry and Materials Science, Anhui Normal University, Wuhu 241002, P.R. China

Corresponding authors. E-mail: jrhuang@mail.ahnu.edu.cn; zyx07157@mail.ustc.edu.cn.

Phone. +86-553-3869-303. Fax. +86-553-3869-303.

## 1. Preparation of three-dimensional rGO

Modified Hummer's method was used to prepare graphene oxide (GO). Moreover, 0.5 g of natural graphite powder was added to 15 ml of  $\text{H}_2\text{SO}_4$  (Shanghai Aladdin Bio-Chem Technology Co., Ltd) and stirred vigorously for 20 h at room temperature, followed by the addition of 0.375 g of  $\text{NaNO}_3$  (Shanghai Aladdin Bio-Chem Technology Co., Ltd) under vigorous stirring for 0.5 h with ice-treatment. Thereafter, 2.0 g of  $\text{KMnO}_4$  (Shanghai Aladdin Bio-Chem Technology Co., Ltd) was gradually added to the mixed solution and stirred for 0.5 h at approximately 40 °C. The mixture was then set for 5 d at room temperature, and 60 ml deionized water was gradually added under continuous stirring for 10 min. Finally, the reaction was completed by the addition of 3 ml of 30% (weight ratio)  $\text{H}_2\text{O}_2$  solution, resulting in the formation of a bright yellow suspension. Graphene oxide was obtained by a series of treatment processes such as centrifugation, washing with 30%  $\text{HCl}$  and deionized water, and vacuum-drying. Thereafter, the as-synthesized graphene oxide was uniformly dispersed in deionized water using ultrasound, to form a 0.9  $\text{mg ml}^{-1}$  graphene oxide (GO) solution. The uniform GO solution was then transferred to a 25 mL Teflon-lined autoclave, and heat-treated at 230 °C for 20 h. After cooling to the room temperature, the successfully synthesized three-dimensional (3D) rGO was washed 10 times using deionized water.

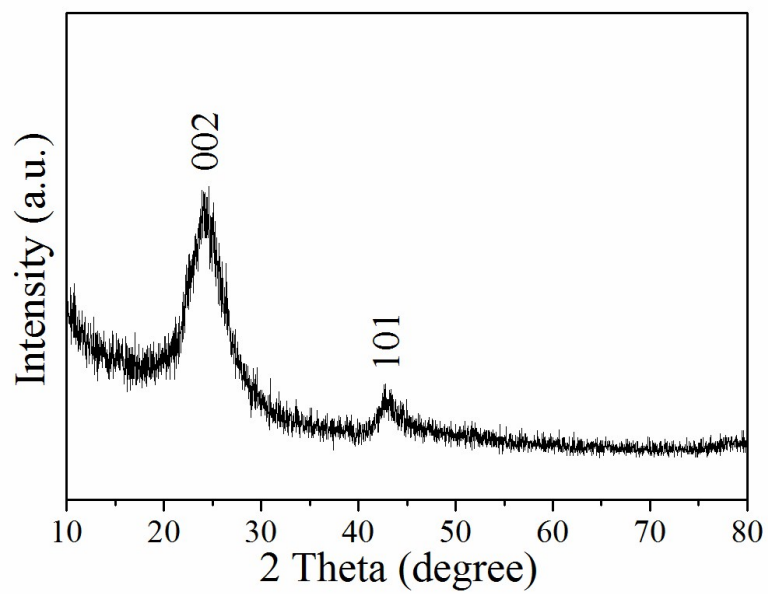

**Fig. S1** XRD pattern of 3D rGO.

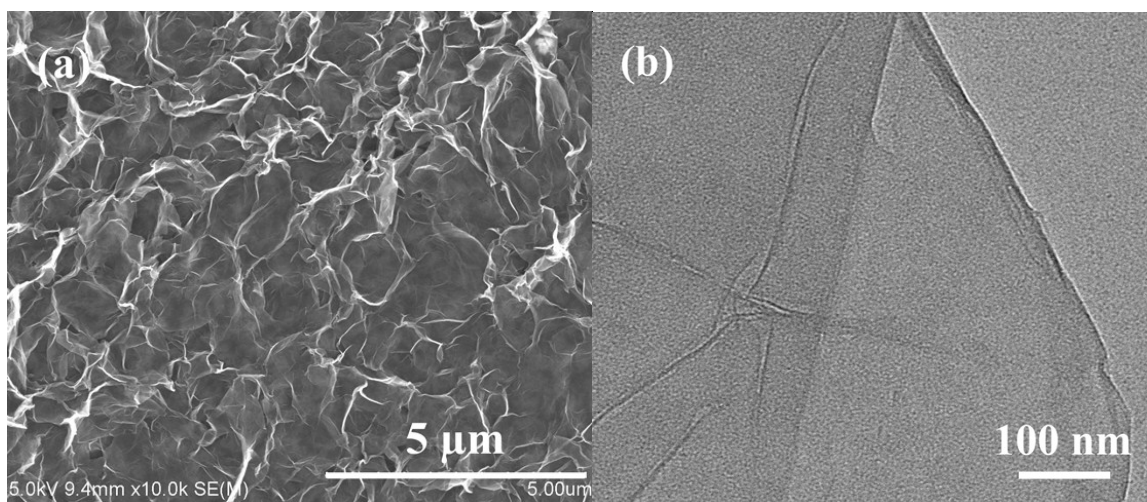

**Fig. S2** (a) SEM and (b) TEM images of 3D rGO.

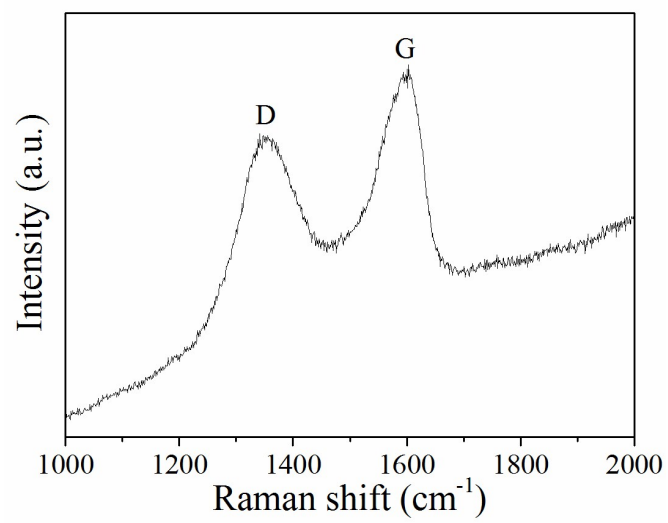

**Fig. S3** Raman spectrum of GO.

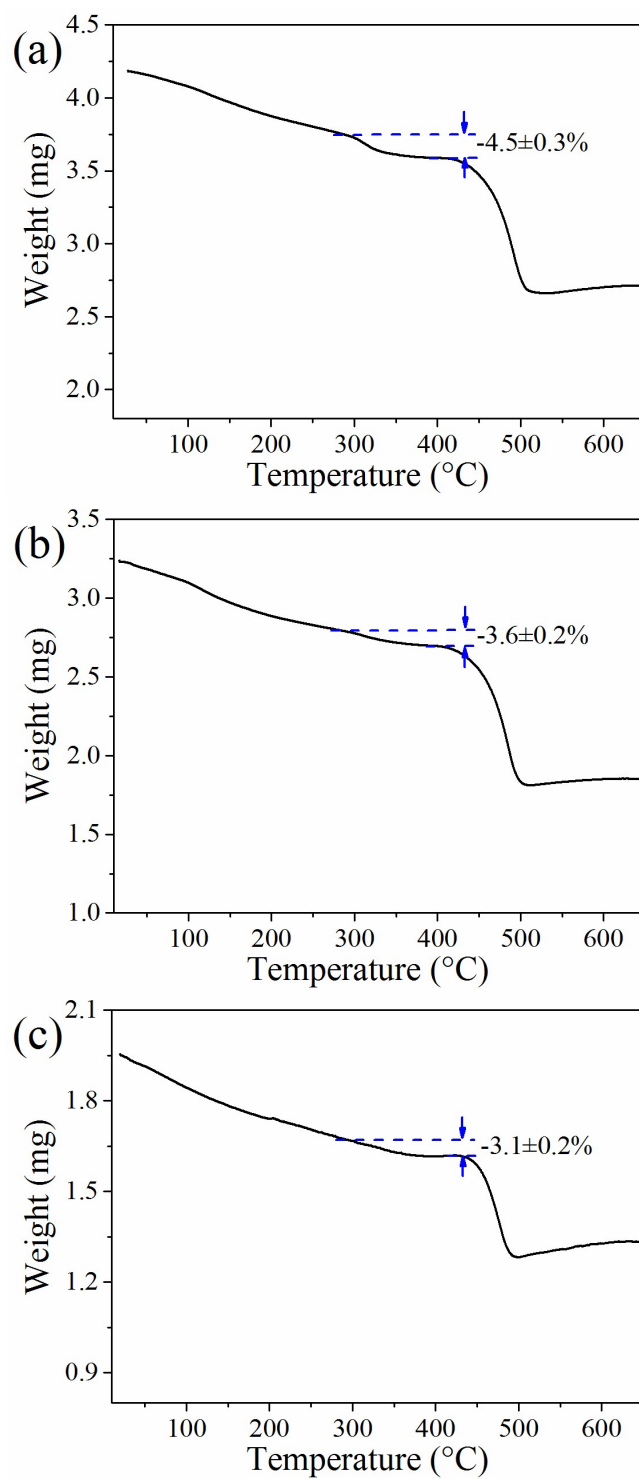

**Fig. S4** TGA curves of (a) CoS@rGO-1, (b) CoS@rGO-2 and (c) CoS@rGO-3 composites from 18 to 650 °C in air at a heating rate of 10 °C min<sup>-1</sup>.

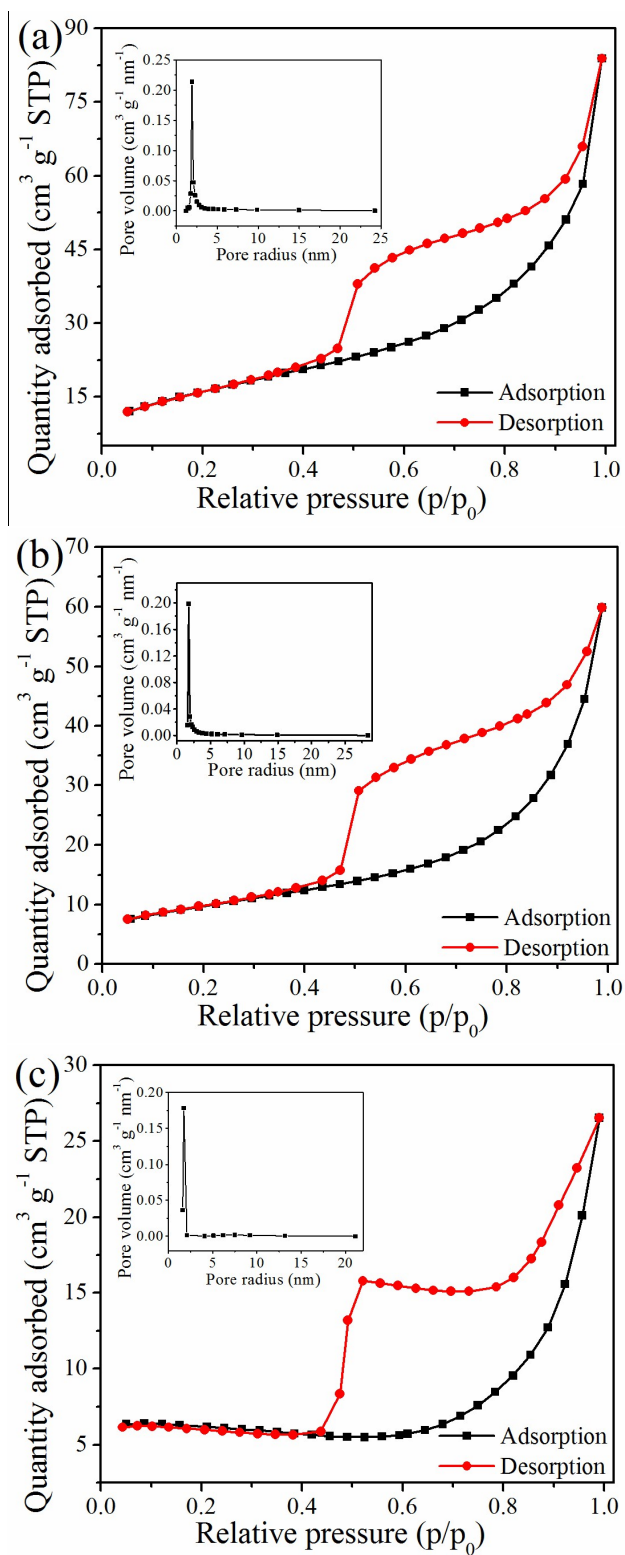

**Fig. S5** Nitrogen adsorption/desorption isotherms and the corresponding pore size distributions (inset) of (a) CoS@rGO-1, (b) CoS@rGO-2 and (c) CoS@rGO-3 composites.

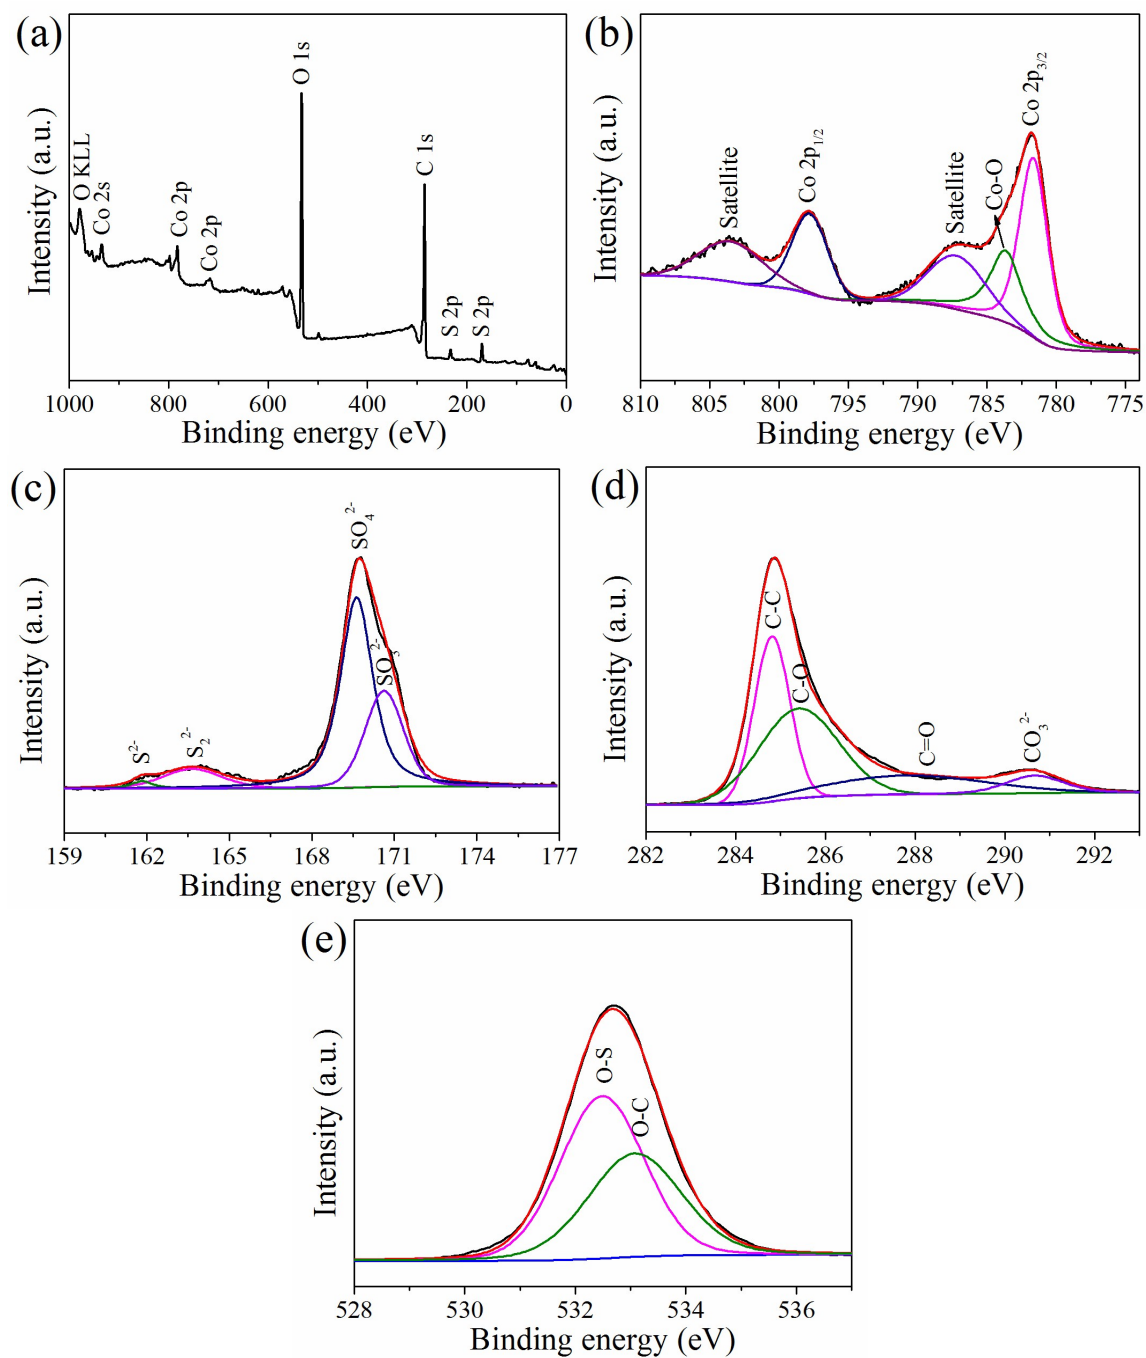

**Fig. S6** XPS spectra of CoS@rGO-2 sample after 100 cycles: (a) survey spectrum, (b) Co 2p spectrum, (c) S 2p spectrum, (d) C 1s spectrum, and (e) O 1s spectrum.

**Table S1** Comparison of electrochemical properties of CoS<sub>x</sub>-related electrodes.

| Electrode material                       | Reversible capacity        | Cycle times | Current density          | Ref.          |
|------------------------------------------|----------------------------|-------------|--------------------------|---------------|
| CoS NPs                                  | 589 mAh g <sup>-1</sup>    | 10          | 0.1 A g <sup>-1</sup>    | [18]          |
| Lantern-like CoS                         | 477 mAh g <sup>-1</sup>    | 400         | 0.1 A g <sup>-1</sup>    | [55]          |
| CoS/CNTs hybrid                          | 780 mAh g <sup>-1</sup>    | 50          | 0.1 A g <sup>-1</sup>    | [22]          |
| CoS nanosheets/rGO foams                 | 481.7 mAh g <sup>-1</sup>  | 100         | 0.06 A g <sup>-1</sup>   | [25]          |
| Cobalt sulfides/rGO composite            | 950 mAh g <sup>-1</sup>    | 50          | 0.1 A g <sup>-1</sup>    | [27]          |
| Cobalt sulfide/rGO composite             | 994 mAh g <sup>-1</sup>    | 150         | 0.2 A g <sup>-1</sup>    | [28]          |
| CoS NFs-rGO                              | 939 mAh g <sup>-1</sup>    | 100         | 0.1 A g <sup>-1</sup>    | [30]          |
| <u>CoS<sub>x</sub>/rGO nanocomposite</u> | 796 mAh g <sup>-1</sup>    | 50          | 0.1 A g <sup>-1</sup>    | [31]          |
| Co <sub>1-x</sub> S hollow spheres/rGO   | 969.8 mAh g <sup>-1</sup>  | 90          | 0.05 A g <sup>-1</sup>   | [32]          |
| CoS nanosheets/rGO                       | 898 mAh g <sup>-1</sup>    | 80          | 0.0589 A g <sup>-1</sup> | [33]          |
| rGO-wrapped CoS NPs                      | 749 mAh g <sup>-1</sup>    | 40          | 0.0625 A g <sup>-1</sup> | [56]          |
| CoS NPs/graphene sheets                  | 600 mAh g <sup>-1</sup>    | 200         | 0.1 A g <sup>-1</sup>    | [57]          |
| CoS <sub>2</sub> /rGO composite          | 831 mAh g <sup>-1</sup>    | 300         | 1.0 A g <sup>-1</sup>    | [38]          |
| CoS@rGO-1                                | 868.1 mAh g <sup>-1</sup>  | 100         | 0.5 A g <sup>-1</sup>    | ( This work ) |
| CoS@rGO-2                                | 1253.9 mAh g <sup>-1</sup> | 100         | 0.5 A g <sup>-1</sup>    | ( This work ) |
| CoS@rGO-3                                | 1056.6 mAh g <sup>-1</sup> | 100         | 0.5 A g <sup>-1</sup>    | ( This work ) |



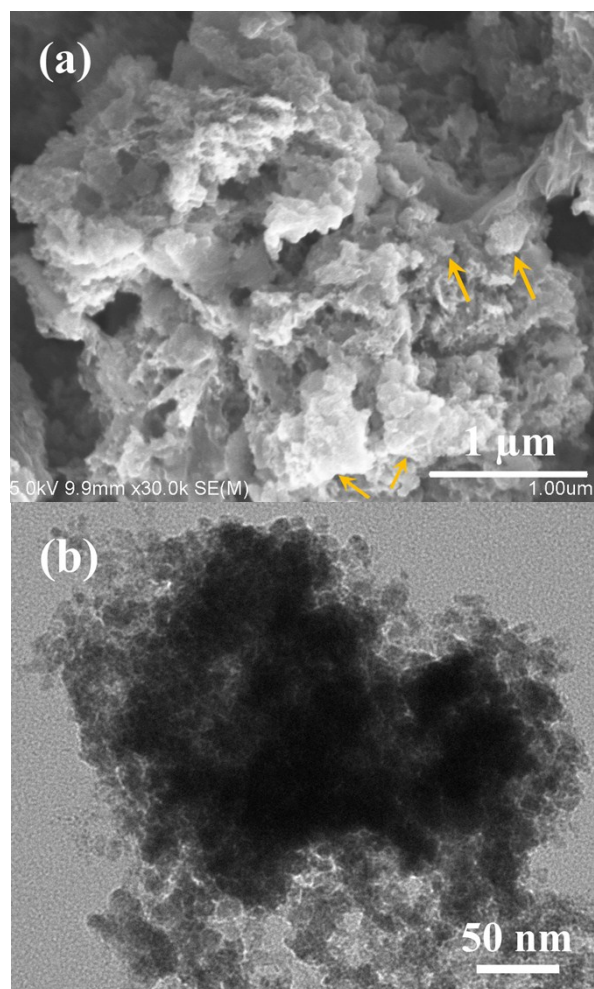

**Fig. S7** (a) SEM image and (b) TEM image of CoS@rGO-3 electrode after 100 cycles at a current density of  $500 \text{ mA g}^{-1}$ .

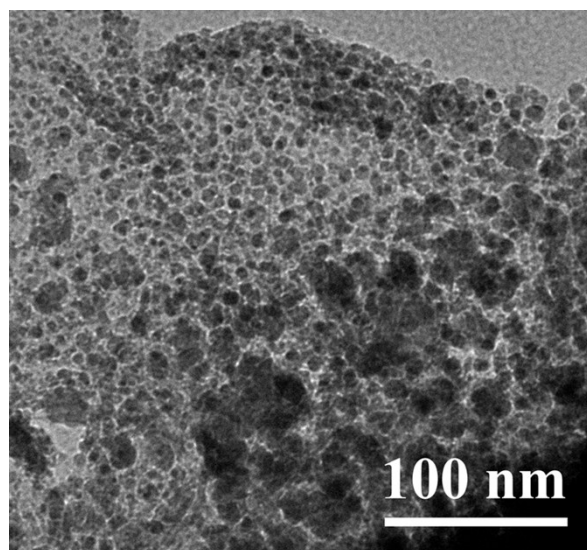

**Fig. S8** TEM image of CoS@rGO-2 electrode after 10 cycles at a current density of  $500 \text{ mA g}^{-1}$ .
